# Supplementary material for: An imperfect tool: contact tracing could provide valuable reductions in COVID-19 transmission if good adherence can be achieved and maintained
Source: bioRxiv or medRxiv preprint supplement (doi:10.1101/2020.06.09.20124008), 2021-05-19
Supplement: Supplementary file [file 2020.06.09.20124008-1.pdf]

Supplementary File for: An imperfect tool:  
COVID-19 ‘test & trace’ success relies on  
minimising the impact of false negatives and  
continuation of physical distancing.

Emma L. Davis<sup>1,+,\*</sup>, Tim C. D. Lucas<sup>1,+</sup>, Anna Borlase<sup>1</sup>,  
Timothy M Pollington<sup>1,3</sup>, Sam Abbott<sup>2</sup>, Diepreye Ayabina<sup>1</sup>,  
Thomas Crellen<sup>1</sup>, Joel Hellewell<sup>2</sup>, Li Pi<sup>1</sup>, CMMID COVID-19  
working group<sup>1</sup>, Graham F. Medley<sup>4</sup>, T. Déirdre  
Hollingsworth<sup>1,†</sup>, and Petra Klepac<sup>2,5,†</sup>

<sup>1</sup>Big Data Institute, University of Oxford, UK.

<sup>2</sup>Department of Infectious Disease Epidemiology, London  
School of Hygiene and Tropical Medicine, UK.

<sup>3</sup>MathSys CDT, University of Warwick, UK.

<sup>4</sup>Centre for Mathematical Modelling of Infectious Disease,  
London School of Hygiene and Tropical Medicine, London, UK.

<sup>5</sup>Department for Applied Mathematics and Theoretical  
Physics, University of Cambridge, UK.

\*Corresponding author

+,<sup>†</sup>Contributed equally

## 1 Additional figures

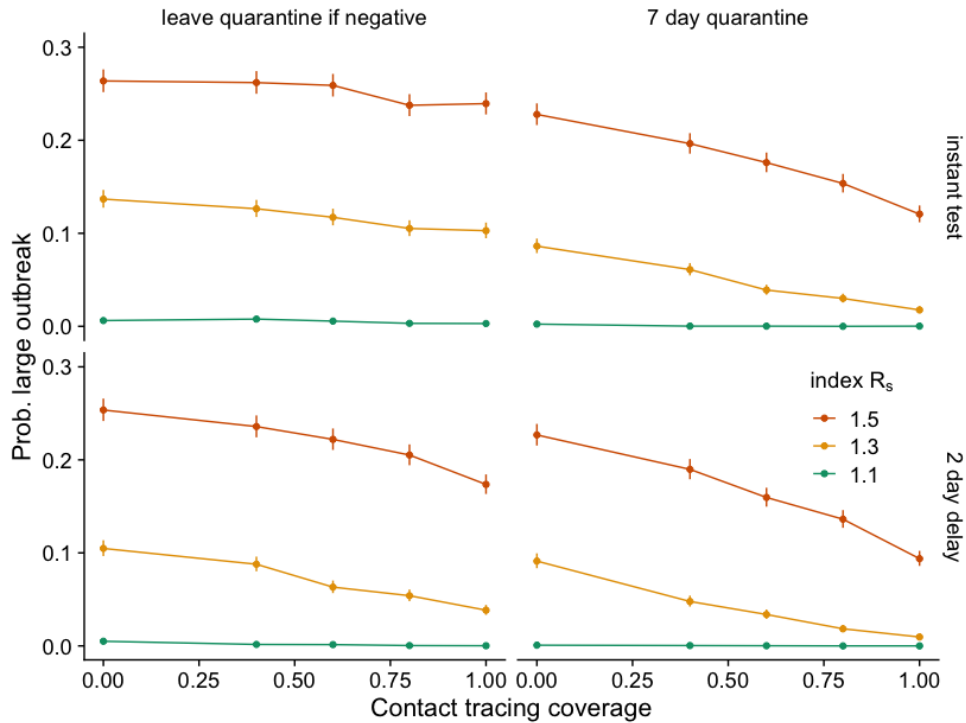

Figure S1: **Comparing testing procedures.** Comparing utility of test-and-release of negative-testing cases (left-hand panels) with maintaining isolation of cases for a minimum of 7 days (right-hand panels) given assumed test sensitivities of 65% or 95%, and compared to no-testing.  $R_S$  is assumed to be 1-3. Error bars: 95% confidence intervals calculated from simulation output variation.

## 2 CMMID working group authorship list

3 The following authors were part of the Centre for Mathematical Modelling of  
4 Infectious Disease 2019-nCoV working group. Each contributed in process-  
5 ing, cleaning and interpretation of data, interpreted findings, contributed

6 to the manuscript, and approved the work for publication: Alicia Rosello,  
7 Rosalind M Eggo, Quentin J Leclerc, Matthew Quaife, Emily S Nightin-  
8 gale, Thibaut Jombart, Jon C Emery, Timothy W Russell, Nikos I Bosse,  
9 Megan Auzenbergs, Amy Gimma, Charlie Diamond, Yang Liu, Kiesha Prem,  
10 Eleanor M Rees, Christopher I Jarvis, W John Edmunds, Akira Endo, David  
11 Simons, Billy J Quilty, Damien C Tully, Oliver Brady, C Julian Villabona-  
12 Arenas, Gwenan M Knight, Samuel Clifford, Stéphane Hué, Kevin van Zand-  
13 voort, Adam J Kucharski, Mark Jit, Arminder K Deol, Kathleen O'Reilly,  
14 Anna M Foss, Fiona Yueqian Sun, James D Munday, Hamish P Gibbs, Rein  
15 M G J Houben, Rachel Lowe, Sophie R Meakin, Georgia R Gore-Langton,  
16 Sebastian Funk, Carl A B Pearson, Katherine E. Atkins, Simon R Procter,  
17 Stefan Flasche, Nicholas G. Davies.

18 The following funding sources are acknowledged as providing funding  
19 for the working group authors. Alan Turing Institute (AE). BBSRC LIDP  
20 (BB/M009513/1: DS). This research was partly funded by the Bill & Melinda  
21 Gates Foundation (INV-003174: KP, MJ, YL; NTD Modelling Consortium  
22 OPP1184344: CABP; OPP1180644: SRP; OPP1183986: ESN; OPP1191821:  
23 KO'R, MA). DFID/Wellcome Trust (Epidemic Preparedness Coronavirus re-  
24 search programme 221303/Z/20/Z: CABP, KvZ). Elrha R2HC/UK DFID/  
25 Wellcome Trust/This research was partly funded by the National Institute  
26 for Health Research (NIHR) using UK aid from the UK Government to sup-  
27 port global health research. The views expressed in this publication are  
28 those of the author(s) and not necessarily those of the NIHR or the UK De-  
29 partment of Health and Social Care (KvZ). ERC Starting Grant (#757688:  
30 CJVA, KEA; #757699: JCE, MQ, RMGJH). This project has received fund-  
31 ing from the European Union's Horizon 2020 research and innovation pro-  
32 gramme - project EpiPose (101003688: KP, MJ, WJE, YL). This research  
33 was partly funded by the Global Challenges Research Fund (GCRF) project  
34 'RECAP' managed through RCUK and ESRC (ES/P010873/1: AG, CIJ,  
35 TJ). HDR UK (MR/S003975/1: RME). Nakajima Foundation (AE). NIHR  
36 (16/137/109: BJQ, CD, FYS, MJ, YL; Health Protection Research Unit for  
37 Modelling Methodology HPRU-2012-10096: NGD, TJ; PR-OD-1017-20002:  
38 AR). Royal Society (Dorothy Hodgkin Fellowship: RL). UK DHSC/UK  
39 Aid/NIHR (ITCRZ 03010: HPG). UK MRC (LID DTP MR/N013638/1:  
40 EMR, GRGL, QJL; MC\_PC 19065: RME; MR/P014658/1: GMK). Au-  
41 thors of this research receive funding from UK Public Health Rapid Support  
42 Team funded by the United Kingdom Department of Health and Social Care  
43 (TJ). Wellcome Trust (206250/Z/17/Z: AJK, TWR; 206471/Z/17/Z: OJB;

<sup>44</sup> 208812/Z/17/Z: SC, SFlasche; 210758/Z/18/Z: JDM, NIB, SFunk, SRM).

<sup>45</sup> No funding (AKD, AMF, DCT, SH).
